# Supplementary material
Source: Springer Nature journal article supplement (https://www.springermedizin.de/resource/supplementary/13075_2011_3271_MOESM5_ESM.pdf/9694142)

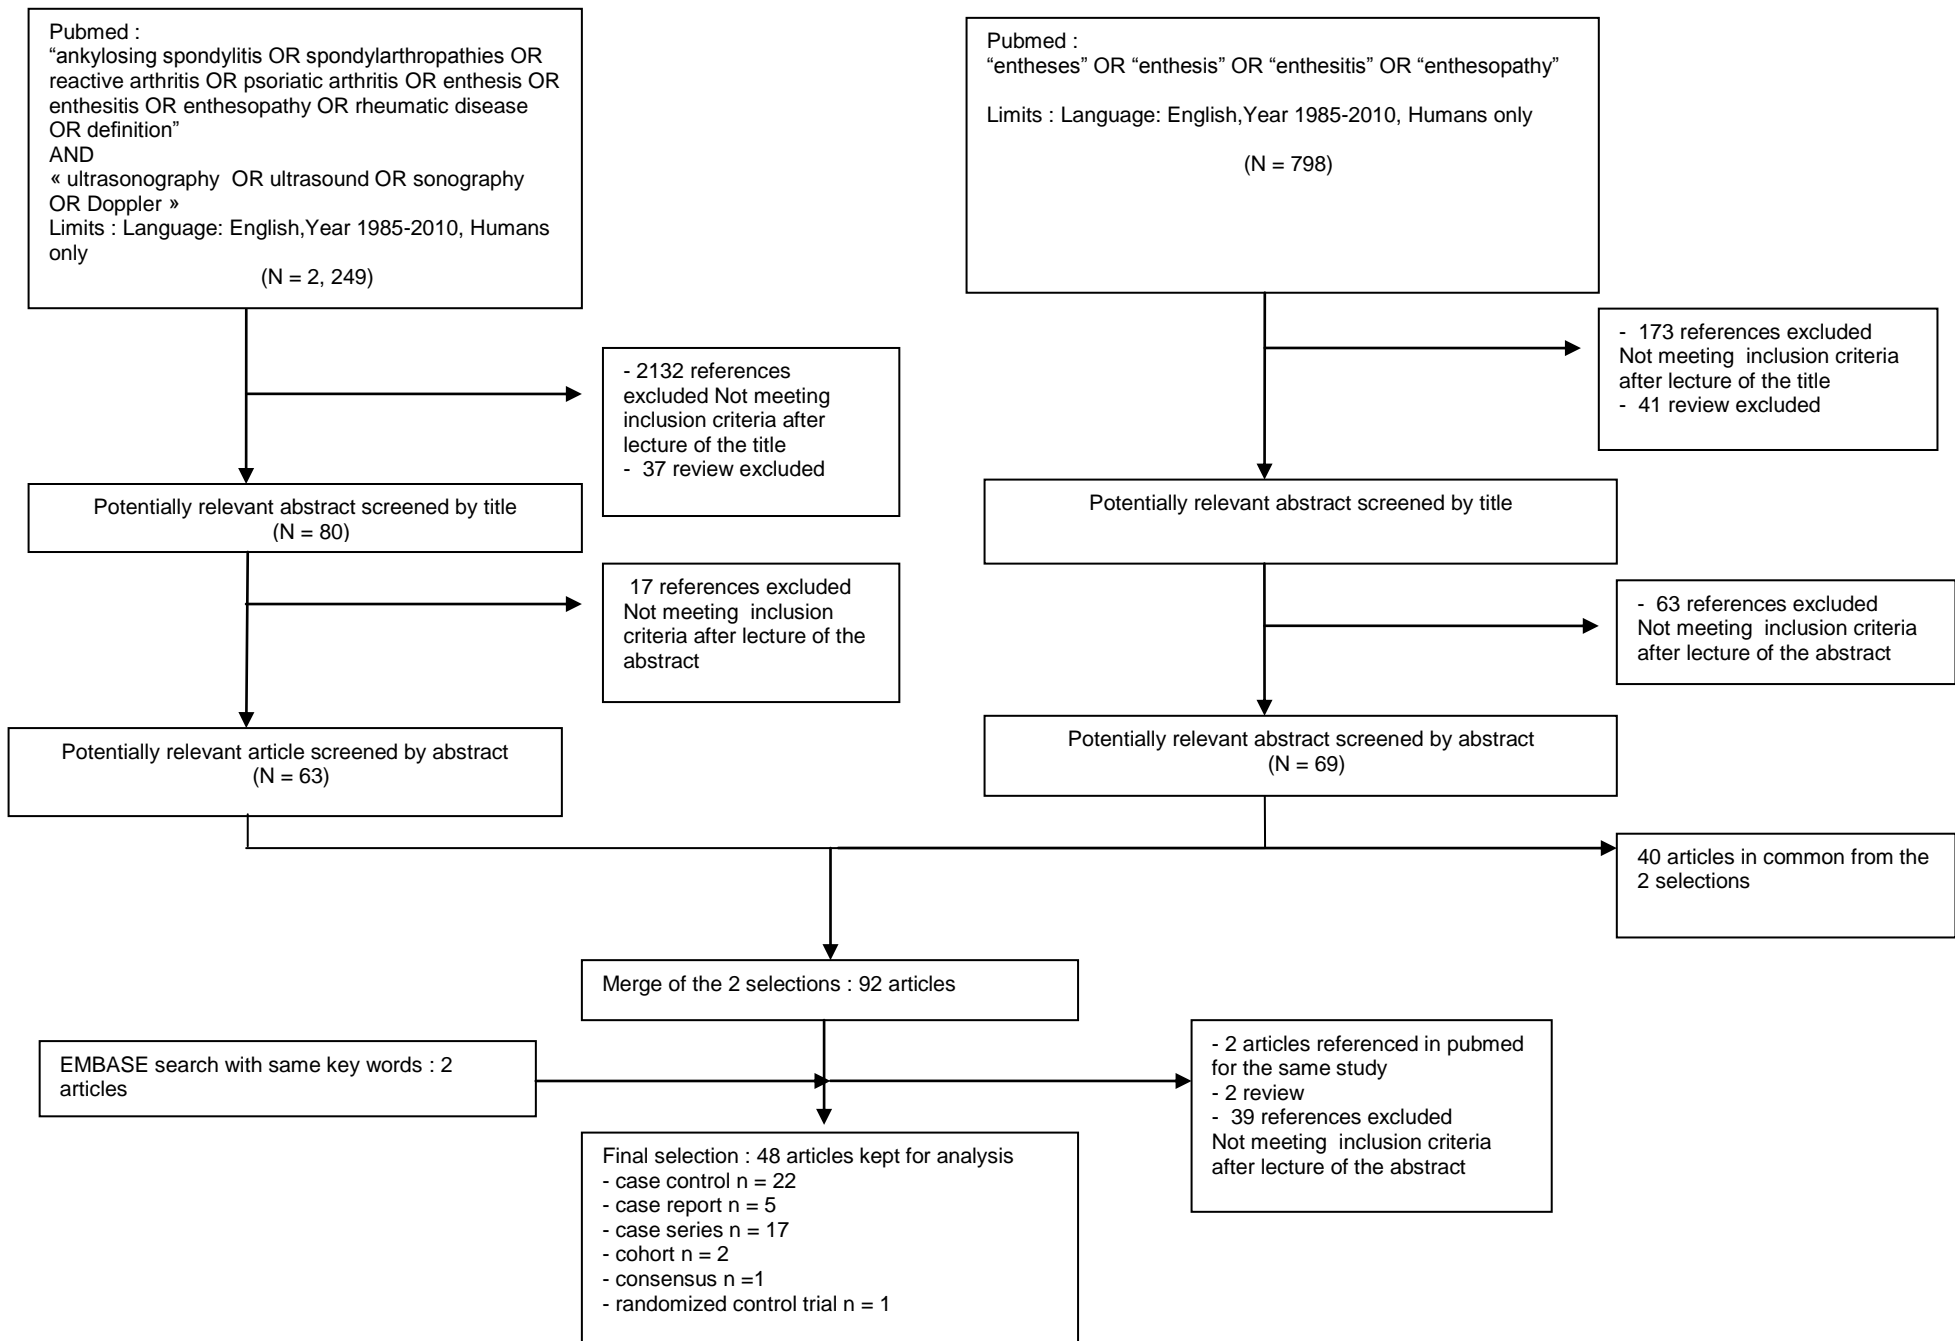

Supplement: MOESM5 [file 9694142]
